# Supplementary material for: Diagonal nematicity in the pseudogap phase of HgBa2CuO4+δ
Source: PubMed Central journal article supplement (PMC6650423; doi:10.1038/s41467-019-11200-1), 2019-07-23
Supplement: 41467_2019_11200_MOESM1_ESM.pdf [file 41467_2019_11200_MOESM1_ESM.pdf]

**Supplementary Information:**  
**Diagonal Nematicity in the Pseudogap Phase of  $\text{HgBa}_2\text{CuO}_{4+\delta}$**

H. Murayama<sup>1</sup>, Y. Sato<sup>1</sup>, R. Kurihara<sup>1</sup>, S. Kasahara<sup>1</sup>, Y. Mizukami<sup>2</sup>, Y. Kasahara<sup>1</sup>,  
H. Uchiyama<sup>3,4</sup>, A. Yamamoto<sup>5</sup>, E.-G. Moon<sup>6</sup>, J. Cai<sup>7</sup>, J. Freyermuth<sup>7</sup>, M. Greven<sup>7</sup>,  
T. Shibauchi<sup>2</sup>, Y. Matsuda<sup>1</sup>

<sup>1</sup> *Department of Physics, Kyoto University, Kyoto 606-8502 Japan*

<sup>2</sup> *Department of Advanced Materials Science, University of Tokyo, Chiba 277-8561, Japan*

<sup>3</sup> *Materials Dynamics Laboratory, RIKEN SPring-8 Center, 1-1-1 Kouto, Sayo, Hyogo 679-5148,  
Japan*

<sup>4</sup> *Research and Utilization Division, Japan Synchrotron Radiation Research Institute  
(SPring-8/JASRI), 1-1-1 Kouto, Sayo, Hyogo 679-5198, Japan*

<sup>5</sup> *Graduate School of Engineering and Science, Shibaura Institute of Technology, 3-7-5 Toyosu,  
Koto-ku, Tokyo, 135-8584, Japan*

<sup>6</sup> *Department of Physics, Korea Advanced Institute of Science and Technology, Daejeon 305-701,  
Korea*

<sup>7</sup> *School of Physics and Astronomy, University of Minnesota, Minneapolis, Minnesota 55455, USA*

**This file includes:**

Supplementary Figure 1

Supplementary Figure 2

Supplementary Figure 3

Supplementary Figure 4

Supplementary Figure 5

Supplementary Figure 6

Supplementary Figure 7

Supplementary Figure 8

Supplementary Figure 9

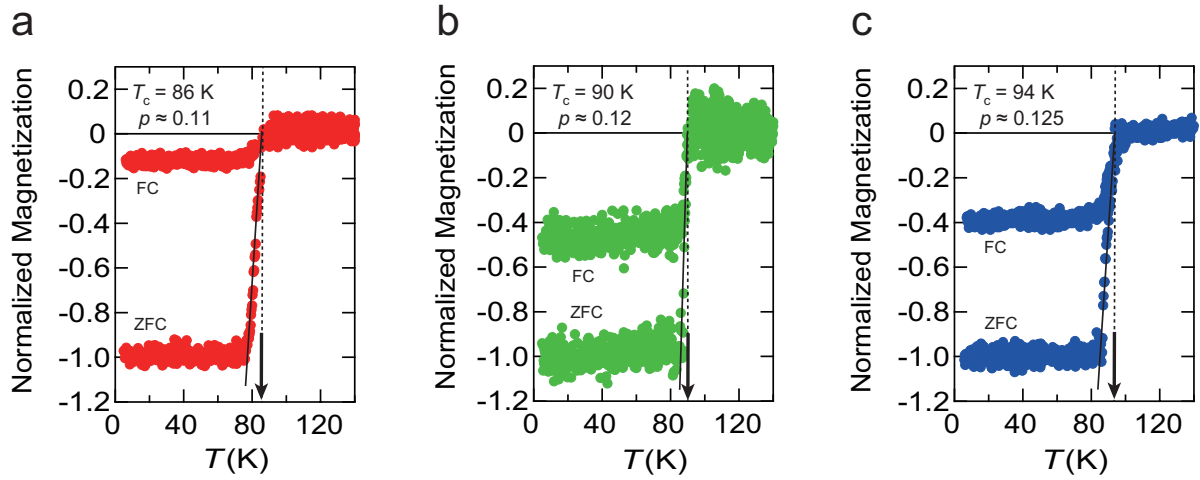

**Supplementary Figure 1 | Superconducting transition in Hg1201 for different doping levels.** **a, b, c,** Temperature dependence of normalized magnetization  $M(T)/|M(5\text{ K})|$  for  $p \approx 0.11$  (**a**),  $0.12$  (**b**) and  $0.125$  (**c**), respectively. The magnetization is measured under field-cooling (FC) and zero-field-cooling (ZFC) conditions in a magnetic field of 10 Oe applied along the  $c$ -axis. Arrows indicate  $T_c$  determined by the onset of diamagnetic signal.

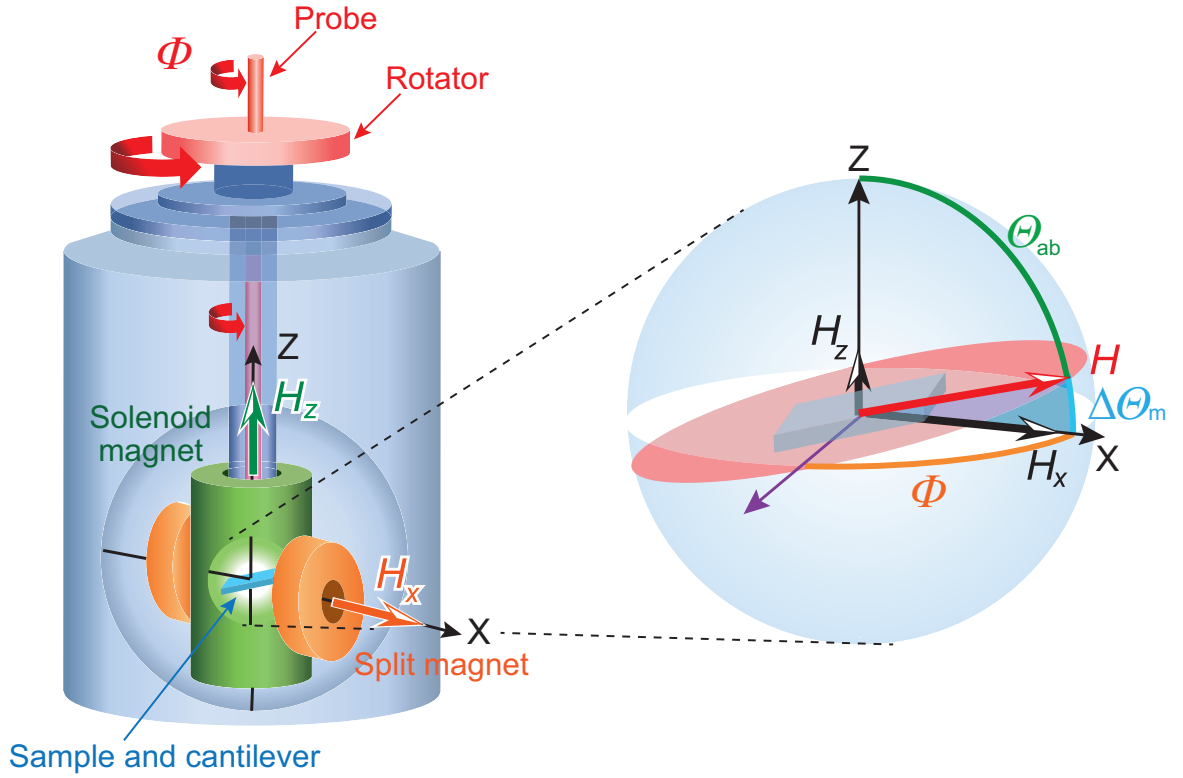

**Supplementary Figure 2 | Schematic figures of the torque measurement system.**

Left: Schematic of the experimental apparatus. To apply the magnetic field  $\mathbf{H}$  relative to the crystal axes with high accuracy, we used a system with two superconducting magnets to generate field components,  $H_X$  (orange arrow) and  $H_Z$  (green arrow), in two mutually orthogonal directions ( $X$  and  $Z$ ), and a mechanical rotation stage at the top of the dewar. The whole sample probe, which is in a variable temperature insert, is rotated around the  $Z$  axis as indicated by the red arrows. Right: Schematic of the in-plane  $\Phi$ -scan measurements.  $\Theta_{ab}$  is the angle between the  $Z$  axis and the crystal  $ab$  plane.  $\Delta\Theta_m$  is the misalignment away from  $H_X$ , which is eliminated at each  $\Phi$  by 2D vector field. (see Supplementary Fig. 3).

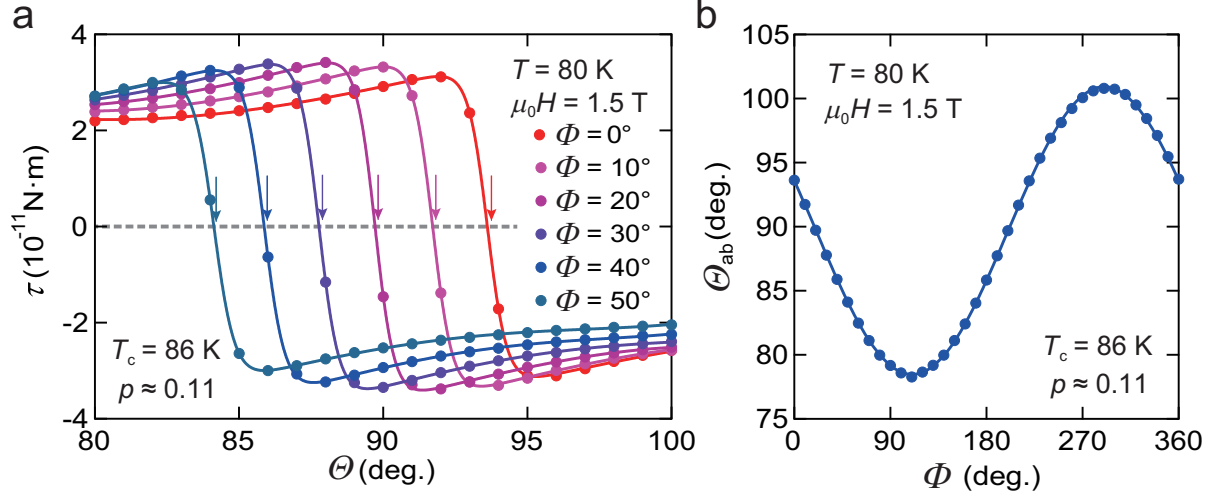

**Supplementary Figure 3 | Determination of the sample alignment.** **a**, Torque  $\tau$  plotted as a function of angle  $\Theta$  from the  $Z$  axis for  $p \approx 0.11$  in the superconducting state at  $T = 80 \text{ K}$  in a magnetic field of  $\mu_0 H = 1.5 \text{ T}$  rotated across the  $ab$  plane at several  $\Phi$ . The torque curve is completely reversible as a function of  $\Theta$  at this temperature.  $\tau$  abruptly changes sign when crossing the  $ab$  plane. The arrows indicate the directions of the  $ab$  plane,  $\Theta_{ab}$ , at which  $\tau$  vanishes. **b**,  $\Theta_{ab}$  plotted as a function of  $\Phi$ .  $\Theta_{ab}$  is nearly perfectly sinusoidal as a function of  $\Phi$ . To precisely rotate  $\mathbf{H}$  within the  $ab$  plane, the misalignment of the  $ab$  plane w.r.t. the  $XY$  plane,  $\Delta\Theta_m = \Theta_{ab} - 90^\circ$ , is eliminated at each  $\Phi$  via computer control of the vector magnet and mechanical rotator. Subsequently, the in-plane torque  $\tau(\phi)$  is measured with a field misalignment smaller than 0.1 deg.

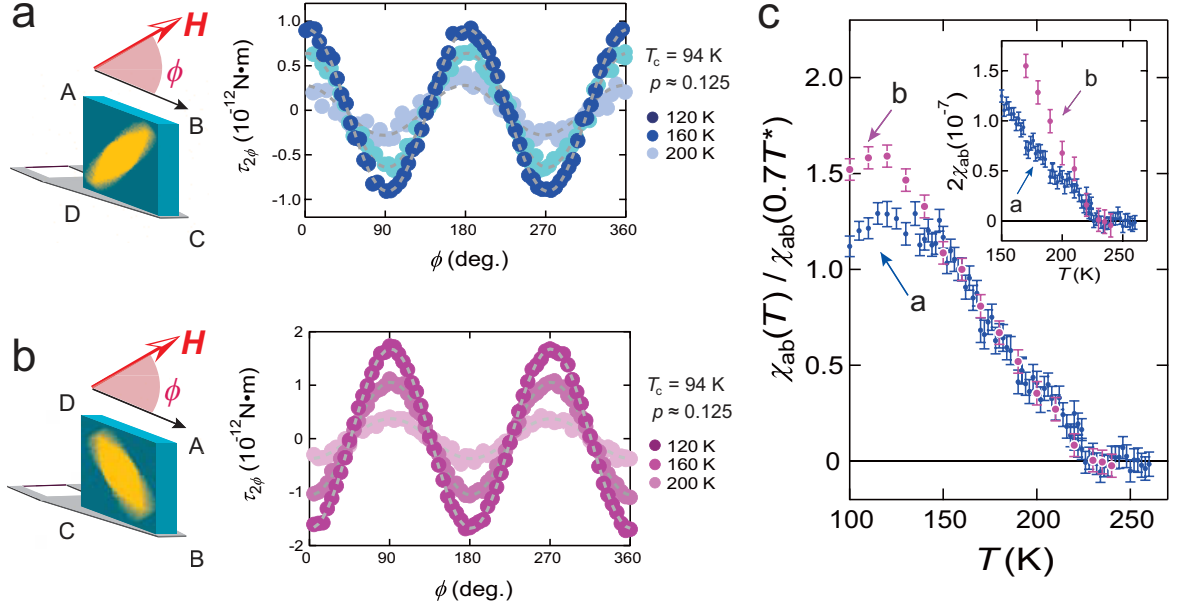

**Supplementary Figure 4 | The influence of strain on the side of the crystal attached to the cantilever.** **a, b**, Left: Schematic of torque measurements in two different configurations. Yellow ellipses indicate the nematic directions. In **b**, the torque is measured after remounting the crystal rotated by 90 deg relative to the configuration illustrated in **a**. Right figures depict the respective  $\tau_{2\phi}$  vs.  $\phi$  data for the crystal with  $p \approx 0.125$ . The direction of the nematicity is unchanged relative to the crystal axes after the crystal rotation. **c**, Inset depicts temperature dependence of  $2\chi_{ab}$  for configurations shown in **a** and **b**. Main panel depicts  $\chi_{ab}(T)/\chi_{ab}(0.7T^*)$  for both configurations. Error bar represents s.d. of the sinusoidal fit to the  $\tau_{2\phi}(\phi)$  curves. The temperature dependence is essentially the same down to 150 K below which short-range CDW order appears.

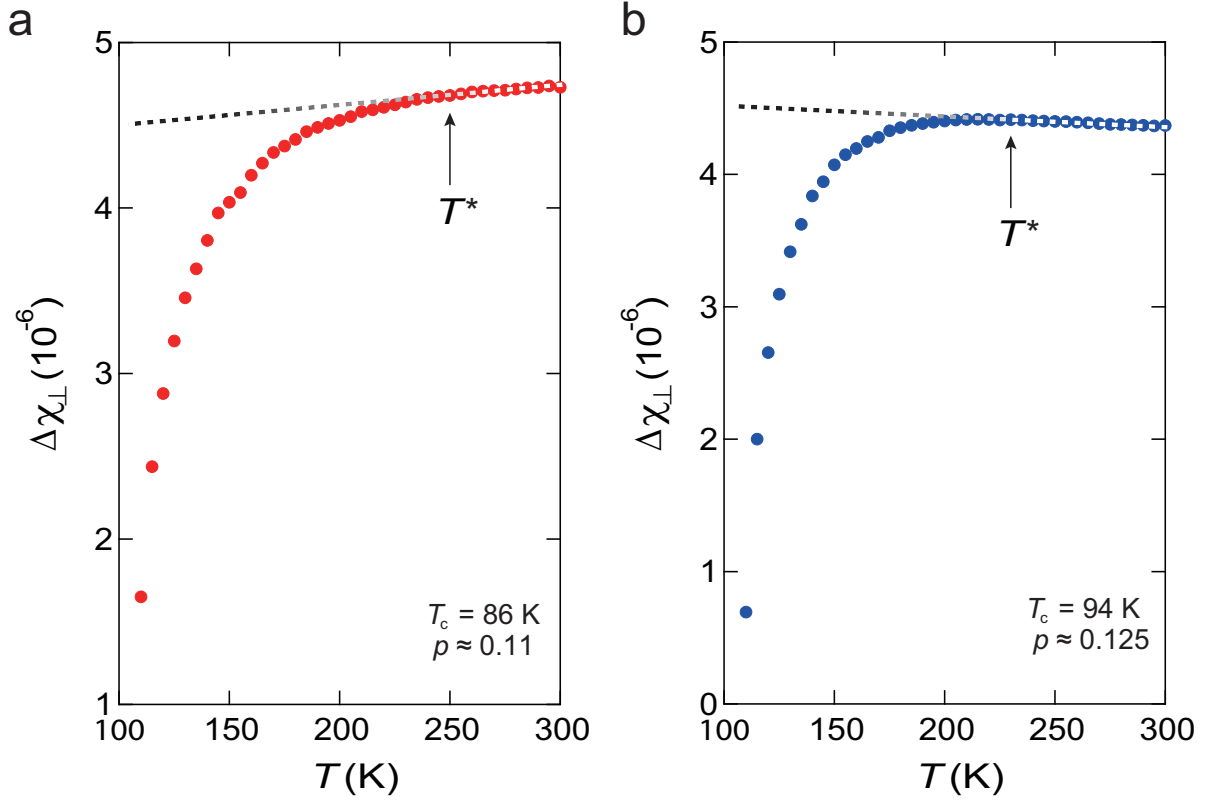

**Supplementary Figure 5 | Out-of-plane anisotropy of the magnetic susceptibility in Hg1201.** Temperature dependence of the out-of-plane anisotropy of the magnetic susceptibility,  $\Delta\chi_{\perp} \equiv \chi_{cc} - \chi_{aa}$ , determined from the  $\tau(\theta)$  curves for  $p \approx 0.11$  (a) and 0.125 (b). Dashed lines are  $T$ -linear fits at high temperatures. Below  $T^*$ ,  $\Delta\chi_{\perp}$  deviates from the high-temperature behaviour.

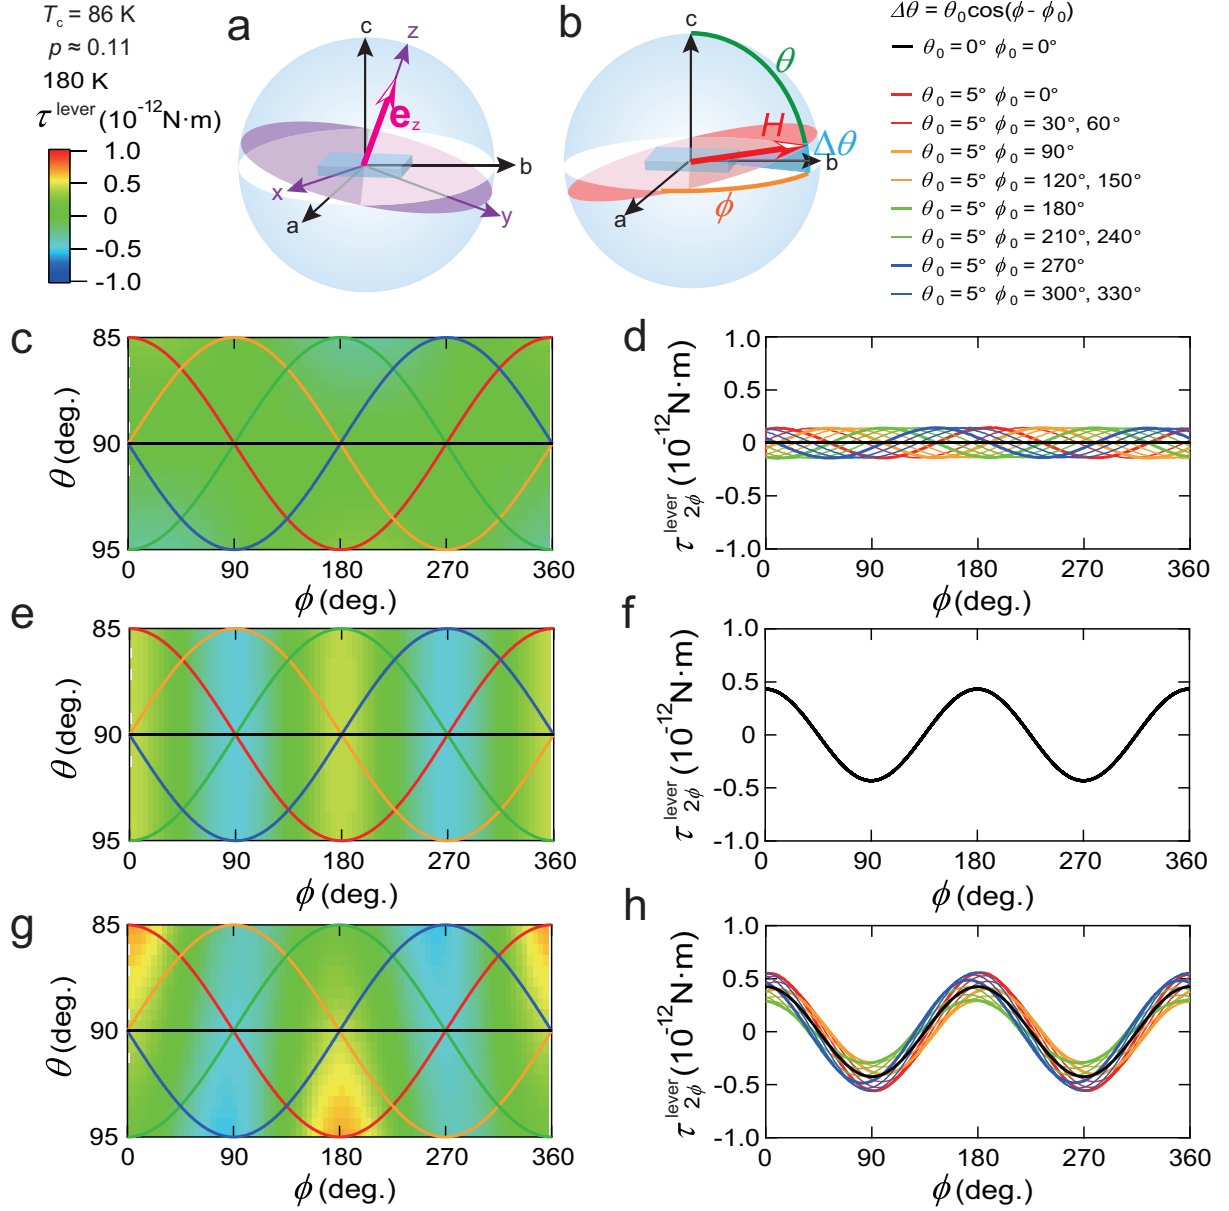

**Supplementary Figure 6 | Expected magnetic torque for the cases with/without in-plane anisotropy.** **a**, Schematic of mount misalignment between sample and cantilever. The crystal axes are labeled by  $a$ ,  $b$ , and  $c$ . Alignment of the cantilever is indicated by  $xyz$  coordinates, where the cantilever probes torque along the  $z$  axis for the bending within the  $xy$  plane (shown in purple). The normal unit vector of the bending plane is indicated by  $\mathbf{e}_z$ . **b**, Schematic of alignment between sample and field rotation plane (shown in red). The misalignment of the magnetic field w.r.t. the  $ab$  plane is given by  $\Delta\theta = \theta_0 \cos(\phi - \phi_0)$ . **c**, Expected torque amplitude,  $\tau^{\text{lever}} = \tau \cdot \mathbf{e}_z$  as a function of field misalignment ( $\theta$ ,  $\phi$ ) calculated for case (A), as discussed in Methods. The calculations are performed for  $p \approx 0.11$  using the

out-of-plane anisotropy,  $\chi_{cc} - \chi_{aa}$ , at 180 K. Mount misalignment between the sample and the lever is included. Diagonal nematicity  $\chi_{ab}$  is supposed to be absent in this calculation. Colours represent the expected torque amplitude  $\tau^{\text{lever}}$ . **d**, Expected angular dependence of the torque,  $\tau_{2\phi}^{\text{lever}}$ , for the trajectories in **c** with various field misalignments. **e**, **f**, Same plots for  $p \approx 0.11$  at 180 K for case (B) (see Methods). In this calculation, both out-of-plane anisotropy,  $\chi_{cc} - \chi_{aa}$ , and in-plane anisotropy,  $\chi_{ab}$ , are included. The mount misalignment between the sample and the lever is supposed to be zero. **g**, **h**, Same plots for  $p \approx 0.11$  at 180 K for case (C) (see Methods). In addition to  $\chi_{cc} - \chi_{aa}$  and  $\chi_{ab}$ , mount misalignment between the sample and the lever is included.



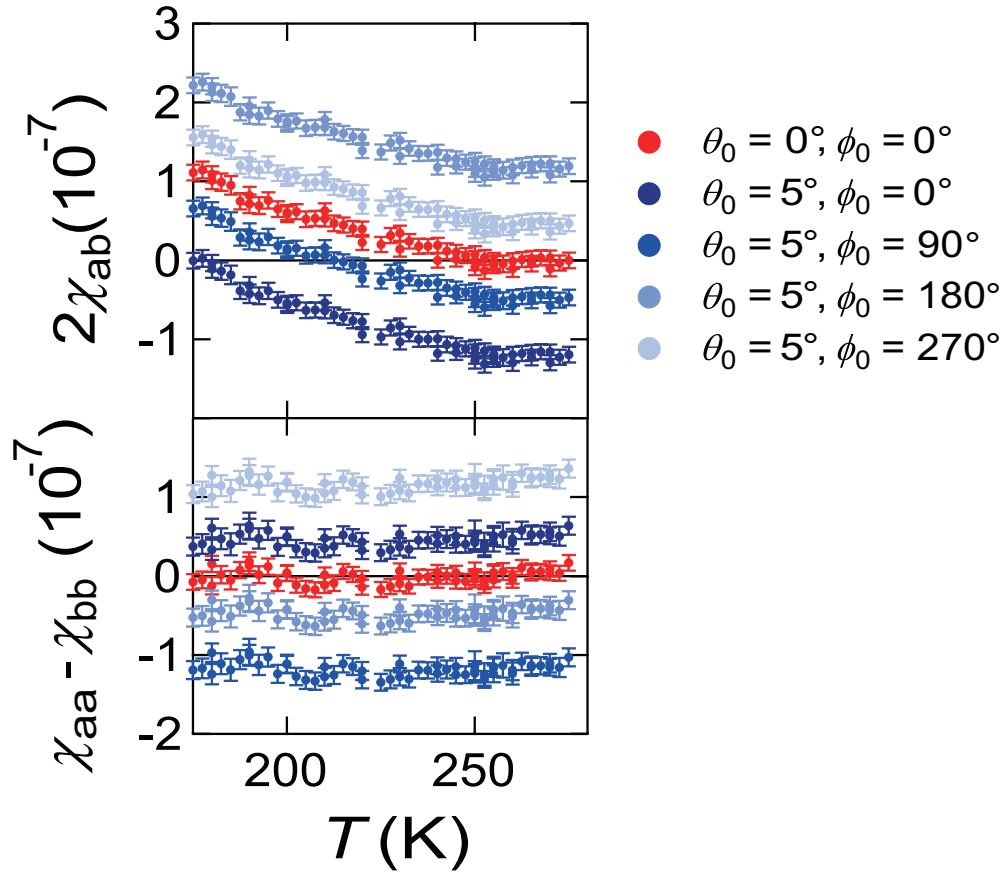

Supplementary Figure 7 | Expected temperature dependence of magnetic susceptibility anisotropies for  $p \approx 0.11$  for a magnetic field rotated in a misaligned plane. Even for a large field misalignment of  $\theta_0 = 5$  deg, the contribution from the out-of-plane component only appears as a slight shift of the original signal, whereas the onset of  $\chi_{ab}$  at  $T^*$  is observed clearly.

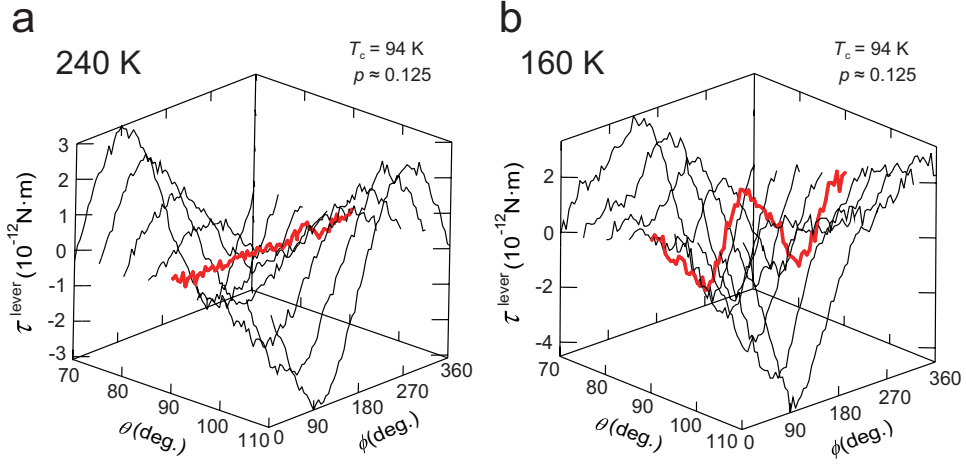

**Supplementary Figure 8 | Magnetic torque for  $p \approx 0.125$  under conical field rotations.** Magnetic torque recorded for conical field rotations at several  $\theta$  at (a)  $T = 240$  K and (b) 160 K, respectively. The sample is mounted on the lever with an apparent mount misalignment of  $\Theta_0 = 10.6$  deg and  $\Phi_0 = 274$  deg. The emergence of the in-plane anisotropy below  $T^*$  is clearly seen at  $\theta = 90$  deg at  $T = 160$  K.

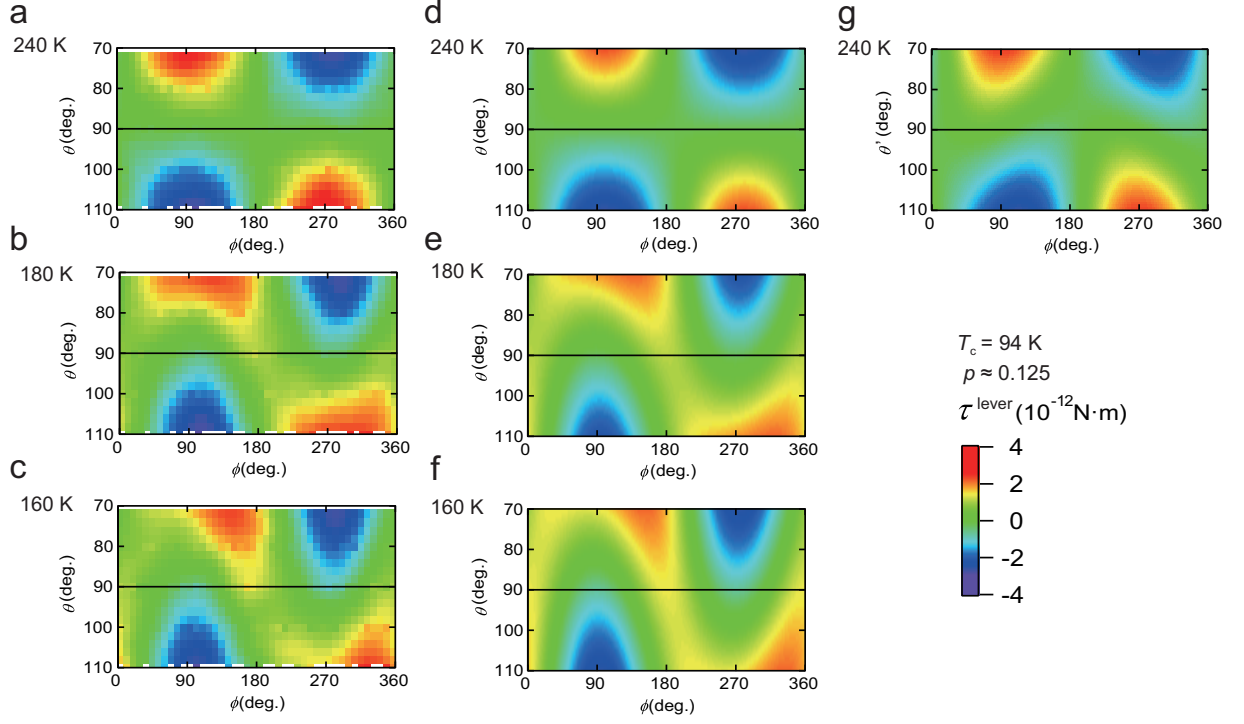

**Supplementary Figure 9 | Comparisons of the observed and the expected torque under finite out-of-plane field component.** **a, b, c,** The observed magnetic torque amplitude mapped in the  $(\theta, \phi)$  plane at  $T = 240, 180,$  and  $160$  K, respectively. Colours represent the amplitude of the magnetic torque. **d, e, f,** The expected torque response at  $T = 240, 180,$  and  $160$  K, respectively, when both field and mount misalignments are present. **g,** The expected torque response when the direction of the sample plane is misidentified. Here, an inclined plane of  $\theta' = (\theta - 5^\circ) \cos(\phi - 20^\circ)$  is assumed as a misidentified direction of the sample plane. At  $T = 240$  K ( $> T^*$ ), in-plane anisotropy is absent and the torque amplitude shows symmetric behaviour in the  $(\theta, \phi)$  plane, indicating that  $\theta = 90$  deg correctly captures the direction of the  $ab$  plane. As the in-plane anisotropy emerges below  $T^*$ , torque response becomes asymmetric in the  $(\theta, \phi)$  plane due to the mixing of two-fold oscillations of the diagonal nematicity.
